# Supplementary material for: Arbuscular mycorrhizal fungi enhanced the growth, phosphorus uptake and Pht expression of olive (Olea europaea L.) plantlets
Source: PeerJ. 2022 Aug 9;10:e13813. doi: 10.7717/peerj.13813 (PMC9373972; doi:10.7717/peerj.13813)
Supplement: Supplemental Information 1 [file peerj-10-13813-s001.xlsx]

## Sheet: Supplementary file 1
Table S1. The geographic coordinates of the sampling sites, AMF spore contents and dominant species in the soil samples.
Code*	Collection location	Coordinates	Number of AMF spores in 20g soil	Dominant AMF species
AMF1 (BZD)	Deqin county	28°14′ N/ 99°17′ E	350	Funneliformis geosporum, Septoglomus constrictum
AMF2 (LYR)	Yongren county	26°01′ N/ 101°37′ E	121	Funneliformis geosporum, Septoglomus constrictum
AMF3 (XYR)	Yongren county	25°58′ N/ 101°40′ E	82	Funneliformis geosporum, Glomus microcarpum
AMF4 (TYL)	Yulong county	27°18′ N/ 100°15′ E	198	Septoglomus constrictum
AMF5 (SQL)	Yulong county	27°16′ N/ 100°16′ E	116	Funneliformis geosporum, Septoglomus constrictum
AMF6	A commercial AMF inoculant from a biofertilizer company			Claroideoglomus etunicatum, Funneliformis mosseae, Rhizophagus intraradices, R. aggregatus
Note: * The letters in parentheses are the corresponding codes in the references (Jing et al. 2022, DOI: 10.32604/phyton.2022.021989)
