# Supplementary material for: Arbuscular mycorrhizal fungi enhanced the growth, phosphorus uptake and Pht expression of olive (Olea europaea L.) plantlets
Source: PeerJ. 2022 Aug 9;10:e13813. doi: 10.7717/peerj.13813 (PMC9373972; doi:10.7717/peerj.13813)
Supplement: Supplemental Information 2 [file peerj-10-13813-s002.xlsx]

## Sheet: Supplementary file 2
Table S2. The phosphate transporter gene information in wild olive.
Name/ID	Location	Protein	length	Product	Family	Involved in this study
LOC111403637	Chr1	XP_022887986.1	533	inorganic phosphate transporter 1-11-like	Pht1
LOC111399728	Chr9	XP_022882966.1	544	inorganic phosphate transporter 1-4-like isoform X5
	Chr9	XP_022882965.1	536	inorganic phosphate transporter 1-4-like isoform X4
	Chr9	XP_022882964.1	540	inorganic phosphate transporter 1-4-like isoform X3
	Chr9	XP_022882963.1	540	inorganic phosphate transporter 1-4-like isoform X2
	Chr9	XP_022882962.1	540	inorganic phosphate transporter 1-4-like isoform X1
LOC111402953	Chr11	XP_022887052.1	550	inorganic phosphate transporter 1-2-like		√
LOC111371596	Chr22	XP_022849431.1	538	inorganic phosphate transporter 1-4-like
	Chr22	XP_022849430.1	538	inorganic phosphate transporter 1-4-like
LOC111373305	Un	XP_022851584.1	533	inorganic phosphate transporter 1-4-like
	Un	XP_022851583.1	533	inorganic phosphate transporter 1-4-like
LOC111378718	Un	XP_022857721.1	541	inorganic phosphate transporter 1-4-like
	Un	XP_022857720.1	541	inorganic phosphate transporter 1-4-like
LOC111380187	Un	XP_022859447.1	528	inorganic phosphate transporter 1-11-like		√
LOC111381559	Un	XP_022861120.1	528	inorganic phosphate transporter 1-4-like
LOC111381553	Un	XP_022861114.1	277	inorganic phosphate transporter 1-4-like, partial
LOC111390556	Un	XP_022871378.1	512	inorganic phosphate transporter 1-4-like
LOC111391939	Un	XP_022872993.1	521	inorganic phosphate transporter 1-4		√
LOC111403381	Chr11	XP_022887638.1	570	inorganic phosphate transporter 2-1, chloroplastic-like	Pht2
LOC111406313	Chr12	XP_022891466.1	572	inorganic phosphate transporter 2-1, chloroplastic-like
LOC111396253	Chr6	XP_022878397.1	788	phosphate transporter PHO1 homolog 1 isoform X2	PHO
	Chr6	XP_022878396.1	794	phosphate transporter PHO1 homolog 1 isoform X1
LOC111399261	Chr8	XP_022882298.1	790	LOW QUALITY PROTEIN: phosphate transporter PHO1 homolog 10-like
LOC111398957	Chr8	XP_022881905.1	782	phosphate transporter PHO1 homolog 1-like isoform X2
	Chr8	XP_022881904.1	787	phosphate transporter PHO1 homolog 1-like isoform X1
LOC111404031	Chr11	XP_022888515.1	101	phosphate transporter PHO1 homolog 1-like
LOC111381344	Un	XP_022860893.1	793	phosphate transporter PHO1 homolog 3-like		√
LOC111387176	Un	XP_022867486.1	796	phosphate transporter PHO1 homolog 1-like isoform X2
	Un	XP_022867485.1	799	phosphate transporter PHO1 homolog 1-like isoform X1
LOC111390544	Un	XP_022871368.1	785	phosphate transporter PHO1-like
